# Supplementary material for: Kinetic isotope effect of proton-coupled electron transfer in a hydrogen bonded phenol—pyrrolidino[60]fullerene
Source: Royal Society of Chemistry journal article supplement (doi:10.1039/c5pp00259a), 2015-10-27
Supplement: c5pp00259a1.pdf [file c5pp00259a1.pdf]

*Supplementary information to*

## **Kinetic isotope effect of proton-coupled electron transfer in a hydrogen bonded phenol-pyrrolidino[60]fullerene**

Janneke Ravensbergen<sup>A</sup>, Chelsea L. Brown<sup>B</sup>, Gary F. Moore<sup>B</sup>, Raoul N. Frese<sup>A</sup>, Rienk van Grondelle<sup>A</sup>, Devens Gust<sup>B</sup>, Thomas A. Moore<sup>B</sup>, Ana L. Moore<sup>B</sup> and John T. M. Kennis<sup>A</sup>

<sup>A</sup> Department of Physics and Astronomy, Faculty of Sciences, VU University, De Boelelaan 1081, 1081 HV, Amsterdam, The Netherlands.

<sup>B</sup> Center for Bioenergy and Photosynthesis, Department of Chemistry and Biochemistry, Arizona State University, Tempe, AZ, USA 85287-1604

### **Materials and methods**

The synthesis of compound **1**, **2** and **3** was described previously.<sup>1</sup> The <sup>1</sup>H-NMR spectra were taken on a Varian spectrometer at 400 MHz. Samples were prepared using equal parts of CDCl<sub>3</sub> and CS<sub>2</sub> with 2% H<sub>2</sub>O or D<sub>2</sub>O and with 0.03% tetramethylsilane as an internal standard. For the spectroscopic investigations the compounds were dissolved in benzonitrile, benzonitrile with 2% v/v D<sub>2</sub>O, and benzonitrile with 2% v/v H<sub>2</sub>O. Benzonitrile and D<sub>2</sub>O were purchased from Sigma Aldrich and used without further purification or deoxygenation.

Room-temperature steady-state absorption spectra were recorded on a Perkin Elmer Lambda 40 UV/VIS spectrometer. Both steady-state and transient absorption spectra were recorded using a 1 mm quartz cuvette.

Transient absorption spectroscopy was performed on a setup using two electronically synchronized amplified Ti:sapphire laser systems (Legend and Libra, Coherent, Santa Clara, CA) as described previously.<sup>2</sup> The amplifiers were seeded by a single 80 MHz oscillator (Vitesse, Coherent) and pumped with separate pump lasers (Evolution, Coherent). Both lasers have an 800 nm output at a repetition rate of 1 kHz. The output power is 3.0 W for the Legend and 4.5 W for the Libra.

For the measurements in benzonitrile, the output of the Legend was used to drive an optical parametric amplifier (OperA SOLO, TOPAS, Coherent) with which the excitation wavelength was set to 705 nm. Excitation energies of 1 μJ were used at a spot size of ~300 μm. A broadband probe beam was generated by focusing part of the output of the Libra on a CaF<sub>2</sub> or sapphire plate. The transient absorption signal was acquired in a multichannel fashion by spectrally dispersing the probe through a spectrograph projecting it on a 256-element diode array detector.<sup>3</sup> The instrument response function had a width of 100 fs (full width at half maximum).

The time difference between pump and probe was controlled in two ways. An optical delay line was used for delays of the pump beam in the fs to 3.5 ns regime. Delay steps of 12.5 ns were generated by selection and amplification of consecutive seed pulses of the oscillator. The timing of the amplification

process of the Libra was controlled by a signal delay generator (SDG Elite, Coherent). A second signal delay generator – one that synchronizes with the first – governed the timing of the Legend (SDG, Coherent). By varying the triggering of the second SDG with respect to the first, delays of the probe were achieved up to 10  $\mu$ s. Both delay methods were applied simultaneously, addressing the fs to  $\mu$ s range in a single experiment.

For the measurements in benzonitrile with 2% v/v D<sub>2</sub>O or H<sub>2</sub>O the pump and probe beam were both generated from the Libra. The time difference between pump and probe was set with an optical delay line, addressing the fs to 3.5 ns regime.

Global analysis of the transient absorption data was performed using the Glotaran program.<sup>4</sup> In global analysis all wavelengths are analyzed simultaneously with a set of common time constants and spectra.<sup>5</sup> Here, we present the results using a sequentially interconverting model. In a sequential analysis (1  $\rightarrow$  2  $\rightarrow$  3  $\rightarrow$  ...) the numbers indicate evolution-associated difference spectra (EADS) that interconvert with successive mono-exponential decay times, each of which can be regarded as the lifetime of each EADS. The first EADS corresponds to the time-zero difference spectrum. The first EADS evolves into the second EADS with time constant  $\tau_1$ , which in turn evolves in the third EADS with time constant  $\tau_2$ , etc. This procedure clearly visualizes the evolution of the excited and intermediate states of the system. In general, the EADS may well reflect mixtures of difference spectra of pure electronic states, which may arise from heterogeneous ground states or branching at any point in the photo-induced evolution.<sup>7-9</sup> For a more detailed description of global analysis we refer to Van Stokkum et al. 2004.<sup>5,6</sup>

### Transient absorption spectroscopy of compound 3

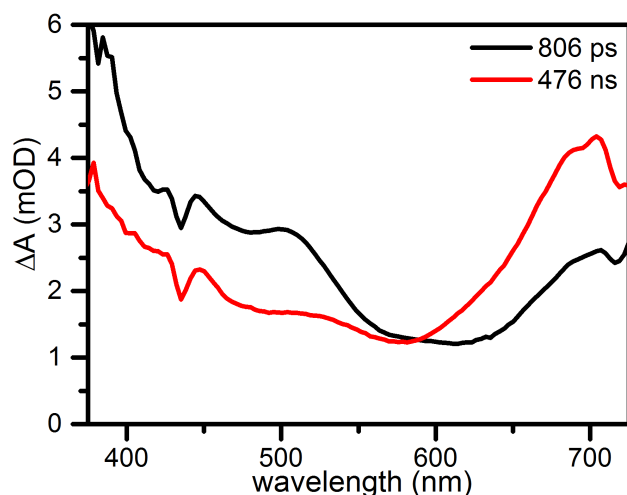

Figure S 1. EADS of **3** in benzonitrile upon 705 nm excitation.

## Raw transient absorption data

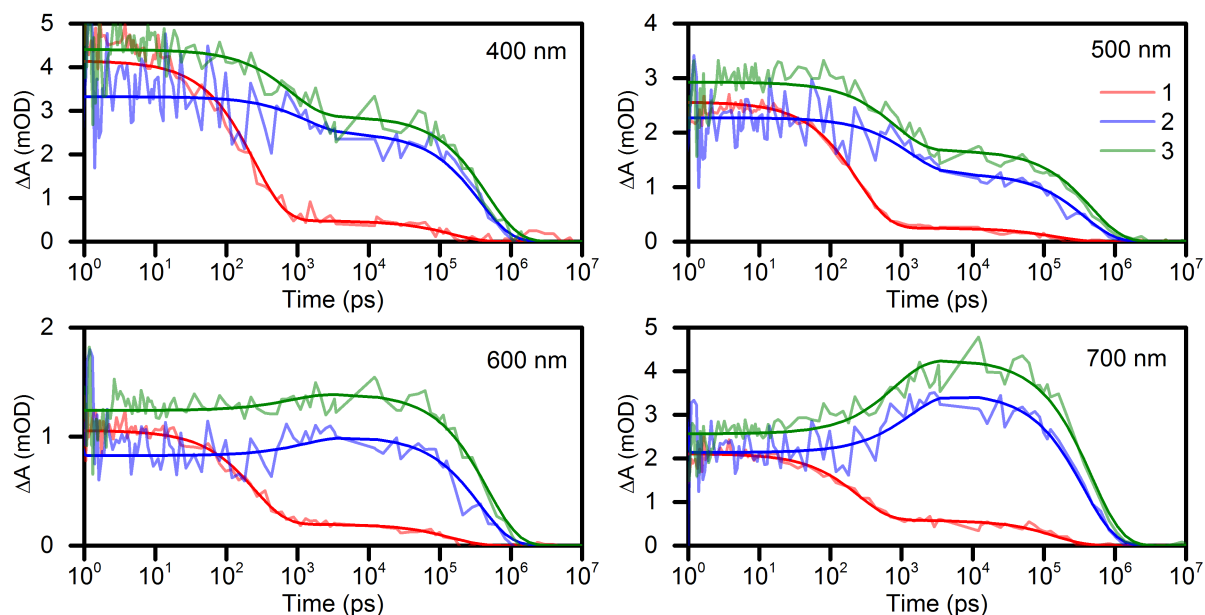

Figure S 2. Raw transient absorption data presented as time traces at 400, 500, 600 and 700 nm. The semi-transparent lines are raw data, the solid lines the fits of compound 1 (red), 2 (blue) and 3 (green).

## <sup>1</sup>H-NMR of compounds 1 and 2

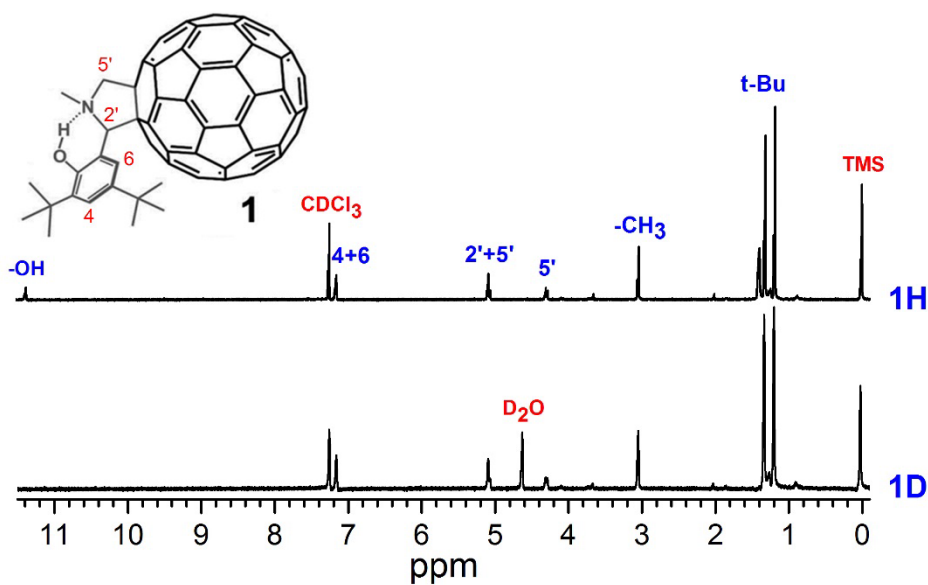

Figure S 3. <sup>1</sup>H-NMR of compound **1** in equal parts CDCl<sub>3</sub>/CS<sub>2</sub> with 2% H<sub>2</sub>O (**1-H**) or 2% D<sub>2</sub>O (**1-D**).

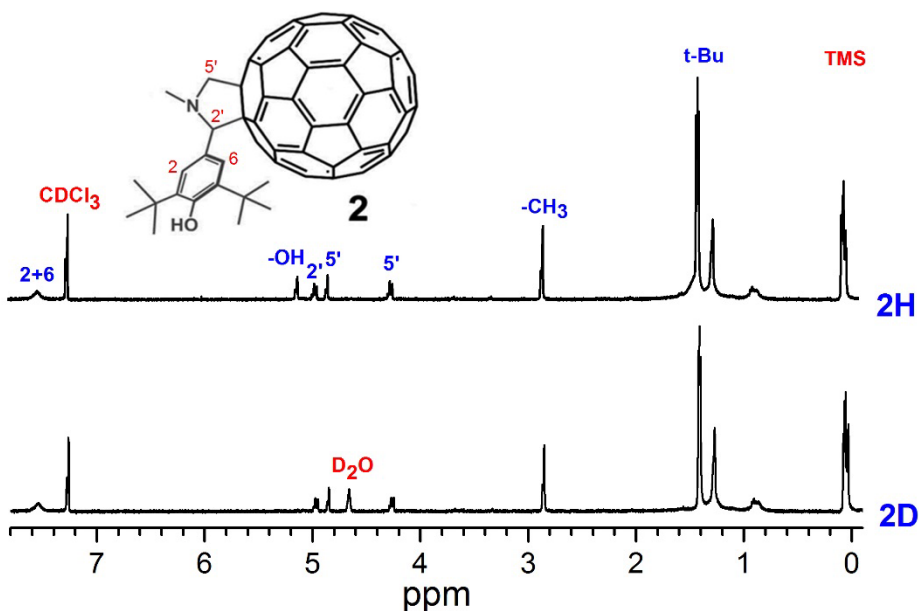

Figure S 4.  $^1\text{H-NMR}$  of compound **2** in equal parts  $\text{CDCl}_3/\text{CS}_2$  with 2%  $\text{H}_2\text{O}$  (**2-H**) or 2%  $\text{D}_2\text{O}$  (**2-D**).

## References

1. G. F. Moore, J. D. Megiatto, M. Hamburger, M. Gervaldo, G. Kodis, T. A. Moore, D. Gust and A. L. Moore, Optical and electrochemical properties of hydrogen-bonded phenol-pyrrolidino[60]fullerenes, *Photochem. Photobiol. Sci.*, 2012, **11**, 1018.
2. J. Ravensbergen, F. F. Abdi, J. H. van Santen, R. N. Frese, B. Dam, R. van de Krol and J. T. M. Kennis, Unraveling the Carrier Dynamics of  $\text{BiVO}_4$ : A Femtosecond to Microsecond Transient Absorption Study, *J. Phys. Chem. C*, 2014, **118**, 27793-27800.
3. R. Berera, R. van Grondelle and J. T. M. Kennis, Ultrafast transient absorption spectroscopy: principles and application to photosynthetic systems, *Photosynthesis Research*, 2009, **101**, 105-118.
4. J. J. Snellenburg, S. Liptenok, R. Seger, K. M. Mullen and I. H. M. van Stokkum, Glotaran: A Java-Based Graphical User Interface for the R Package TIMP, *Journal of Statistical Software*, 2012, **49**, 22.
5. I. H. M. van Stokkum, D. S. Larsen and R. van Grondelle, Global and target analysis of time-resolved spectra, *Biochimica et Biophysica Acta (BBA) - Bioenergetics*, 2004, **1657**, 82-104.
6. I. H. M. van Stokkum, D. S. Larsen and R. van Grondelle, Erratum to "Global and target analysis of time-resolved spectra" [Biochimica et Biophysica Acta 1658/2-3 (2004) 82-104], *Biochimica et Biophysica Acta (BBA) - Bioenergetics*, 2004, **1658**, 262.
7. J. T. M. Kennis and M.-L. Groot, Ultrafast spectroscopy of biological photoreceptors, *Current Opinion in Structural Biology*, 2007, **17**, 623-630.
8. E. Papagiannakis, J. T. M. Kennis, I. H. M. van Stokkum, R. J. Cogdell and R. van Grondelle, An alternative carotenoid-to-bacteriochlorophyll energy transfer pathway in photosynthetic light

harvesting, *Proceedings of the National Academy of Sciences of the United States of America*, 2002, **99**, 6017-6022.

9. C. Bonetti, M. T. A. Alexandre, I. H. M. van Stokkum, R. G. Hiller, M. L. Groot, R. van Grondelle and J. T. M. Kennis, Identification of excited-state energy transfer and relaxation pathways in the peridinin-chlorophyll complex: an ultrafast mid-infrared study, *Physical Chemistry Chemical Physics*, 2010, **12**, 9256-9266.
